# Supplementary material for: Controllable synthesis of novel hierarchical V2O5/TiO2 nanofibers with improved acetone oxidation performance
Source: Royal Society of Chemistry journal article supplement (doi:10.1039/c5ra01001b), 2015-01-01
Supplement: c5ra01001b1.pdf [file c5ra01001b1.pdf]

## Supplementary Information for:

### Controllable Synthesis of Novel Hierarchical V<sub>2</sub>O<sub>5</sub>/TiO<sub>2</sub> Nanofibers

#### with Improved Acetone Oxidation Performance

Xuecheng Zhu, Jinghuan Chen, Xinning Yu, Xinbo Zhu, Xiang Gao \*, Kefa Cen

<sup>†</sup> *State Key Laboratory of Clean Energy Utilization, Zhejiang University, Hangzhou 310027,  
Zhejiang, China*

Number of Supplementary Material pages (including this title page): 3

Fig S1. Conversion of acetone as a function of reaction temperature. Reaction conditions: 300 ml/min feed flow, 500 ppm acetone, 5% O<sub>2</sub>, N<sub>2</sub> balance, 50 mg catalyst, corresponding to a GHSV of 360,000 ml/(g·h).

---

\* *To whom correspondence should be addressed. Fax: (86)571-87951335. E-mail: xgao1@zju.edu.cn*

To further demonstrate the superiority of this special hierarchical nanofibrous morphology, we synthesized and tested another  $V_2O_5/TiO_2$  nanoparticles prepared by impregnation method. Firstly, 5.6436 g ammonium metavanadate and 12.1606 g oxalic acid dehydrate were dissolved in 40 ml deionized water. The solution turned into mazarine after 3 h of magnetic stirring. Afterwards, 4 ml obtained solution was transferred into a 100 ml beaker with 4 g P25 (a kind of  $TiO_2$  powders which is widely used in laboratory, denoted as  $TiO_2$ -NPs) in it. After continuous stirring for 15 min, the mushy mixture was dried in oven at 110 °C overnight. Then the as-obtained sample was calcinated at 500 °C for 3h. Thereby, the  $V_2O_5/TiO_2$  nanoparticles were fabricated, which was denoted as  $V_5Ti$ -NPs. The mass percentage of  $V_2O_5$  in  $V_5Ti$ -NPs was controlled at 5 wt. %, which is the same with  $V_5Ti$  nanofibers (denoted as  $V_5Ti$ -NFs), since  $V_5Ti$ -NFs displayed the highest catalytic activity among the  $V_xTi$  nanofibers.

The catalytic activities of the obtained  $V_5Ti$ -NPs and  $TiO_2$ -NPs for the total oxidation of acetone under the conditions of acetone/oxygen molar ratio = 1/100 and GHSV = 360,000 mL/(g·h) were measured at temperatures ranging from 200 °C to 400 °C. The results were illustrated in Fig. S1. In the whole temperature range,  $V_5Ti$ -NFs displayed a better acetone oxidation performance than  $V_5Ti$ -NPs. Moreover,  $T_{50}$  and  $T_{90}$  of  $V_5Ti$ -NFs are both reduced by about 15 °C compared with  $V_5Ti$ -NPs. In brief, the special hierarchical nanofibrous morphology could promote the mass transfer of reactants and products, which is confirmed by the better oxidation performance of hierarchical  $V_5Ti$ -NFs than that of  $V_5Ti$ -NPs prepared by impregnation method.

Additionally, we have also compared the catalytic performances of pure  $TiO_2$  nanofibers (denoted as  $TiO_2$ -NFs) with pure  $TiO_2$  nanoparticles (P25, denoted as  $TiO_2$ -NPs). The results were illustrated in Fig. S1. In the whole temperature range, pure  $TiO_2$ -NFs displayed a higher activity than pure  $TiO_2$ -NPs. Thereby, the superiority of this special hierarchical nanofibrous morphology was further proven by comparison of pure  $TiO_2$  samples.

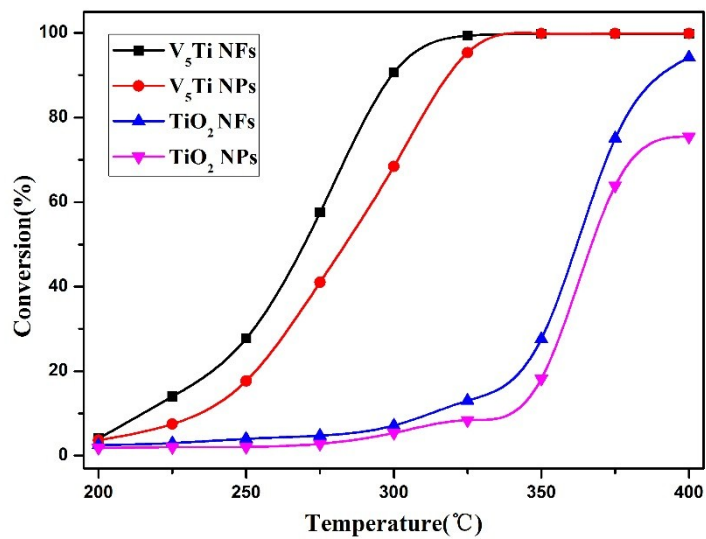

Fig S1. Conversion of acetone as a function of reaction temperature. Reaction conditions: 300 ml/min feed flow, 500 ppm acetone, 5% O<sub>2</sub>, N<sub>2</sub> balance, 50 mg catalyst, corresponding to a GHSV of 360,000 ml/(g·h).
